# Supplementary material
Source: PubMed Central journal article supplement (PMC3370475)
Supplement: supp_78.13.4669_AEM-AEM00936-12-s01.pdf [file supp_78.13.4669_AEM-AEM00936-12-s01.pdf]

484

485 **Figure S1**

486

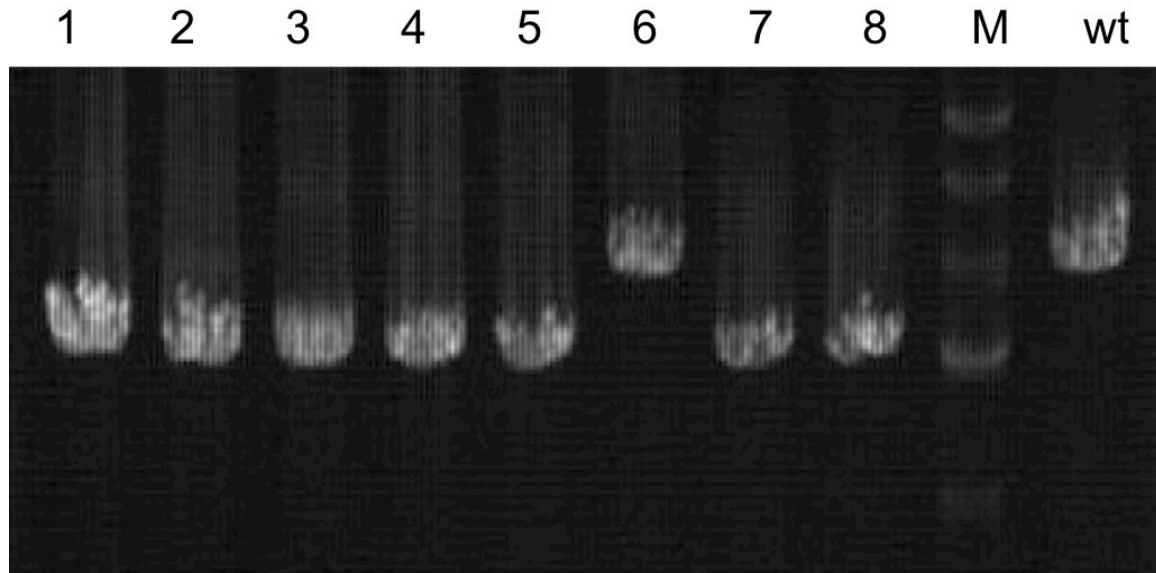

487

488 **Figure S1.** Screening of putative *trpAB* marker replacement mutants. A 3.9kb

489 product is produced from the wild type, while a 3.1kb band is produced by the

490 targeted marker replacement.

491 **Figure S2**

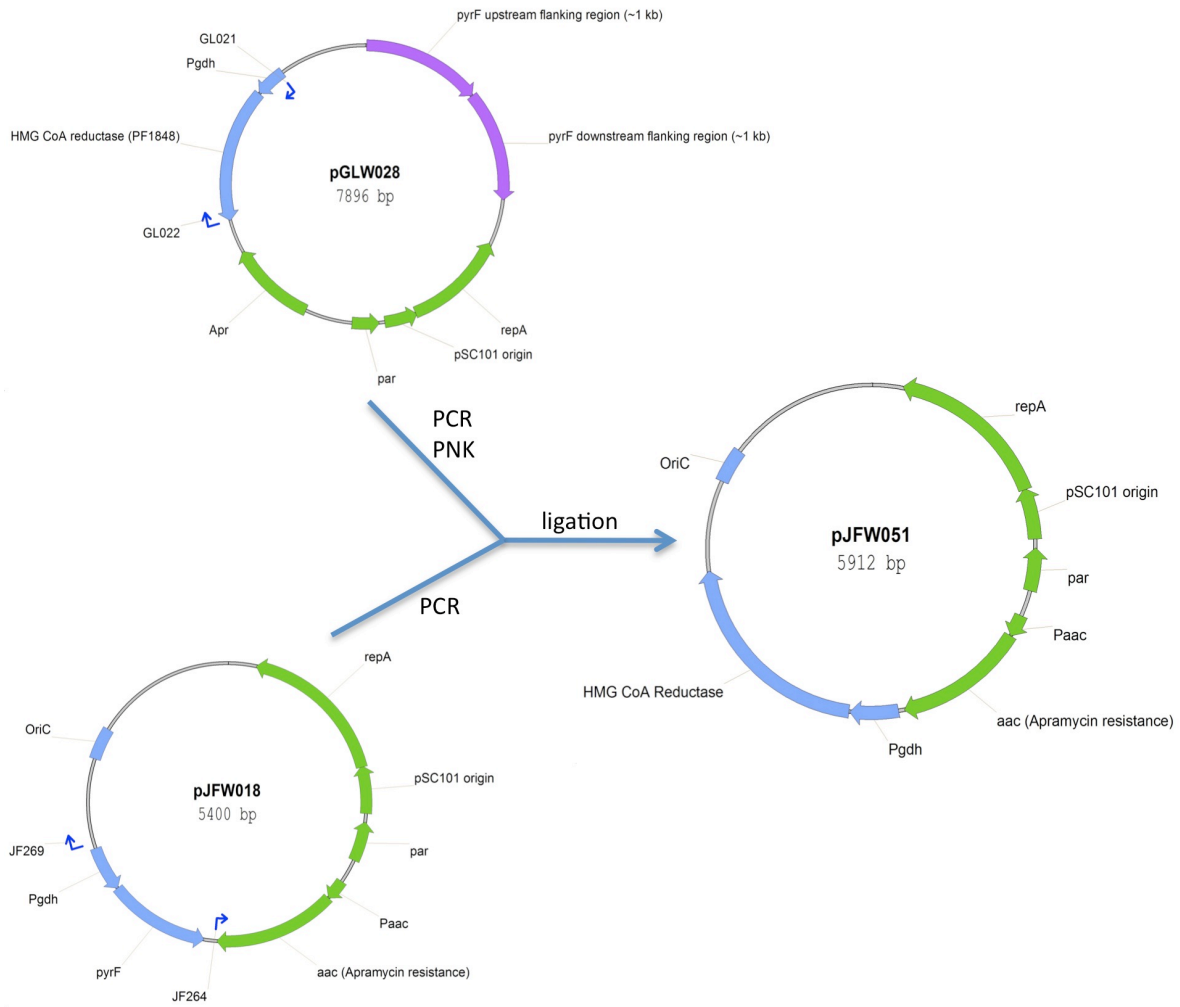

492

493 **Figure S2.** Construction of pJFW051. A 4.4kb fragment was amplified by PCR  
 494 from pJFW018 using primers JF264 and JF269. The  $P_{gdh}$ -*hmg* cassette (22) was  
 495 amplified from pGLW28 (21) using primers GL021 and GL022, treated with T4  
 496 polynucleotide kinase and ligated into the 4.4kb fragment to produce pJFW051.

497

498

499 **Table S1. Primer Sequences**

| Primer     | Sequence (5' to 3')      |
|------------|--------------------------|
| pyrF500bpF | AAAACAGATATCCGAAATACTCGA |

---

pyrF500bpF GGTATCTCCCAATCTTATCCCT  
 pyrF250bpF ACGAGGCAATAAAGTTTCGACGCAA  
 pyrF250bpF TAAGATCTTCCTTATCAGAGAGCT  
 pyrF150bpF GAGATTGTCAAGAGACTCTATGAT  
 pyrF150bpF TCTGTGGTCTTATCGAACTCCGCA  
 pyrF100bpF TACTTGGGCAGATAAAAATTGGAAG  
 pyrF100bpF AGCATCTTGCTTGCAATTTCTCT  
 pyrF50bpF AGTCGTCTTAAAGGGAGACCAACT  
 pyrF50bpR ATCTCTTTAACATCCTTCTTGCTT  
 pyrF40bpF AGGGAGACCAACTCCCAGGGAAATATT  
 pyrF40bpR TTGATTATCTCTTTAACATCCTTCTTGCTT  
 pyrF30bpF ACTCCCAGGGAAATATTGGAGGT  
 pyrF30bpR CTTTAACATCCTTCTTGCTTAGGG  
 pyrF20bpF GAAATATGGAGGTGGCTGAATGATTGTAC  
 pyrF20bpR CTTCTTGCTTAGGGGGTGCTTTATCTTGAG  
 pyrF10bpF AGGTGGCTGAATGATTGTACTAGCGTTGGA  
 pyrF10bpR AGGGGGTGCTTTATCTTGAGCTCCATTCTT  
 pyrF0bpF ATGATTGTACTAGCGTTGGACGTGTATGAG  
 pyrF0bpR TTATCTTGAGCTCCATTCTTTACCTCCTC  
 GL021 GATTGAAAATGGAGTGAGCTGAG  
 GL022 TCATCTCCCAAGCATTTTATGAG  
 GL055 AGAGAGAGGCATGCCACCTACCTCCTATATTGTTCCATG  
 GL058 GAGAGAGGGCGCGCCGTCAAGAGGATGATTAGGTAGAGC  
 GL158 TCAAATGCTCATCATTTAGTTTTATG  
 JF264 CTCCAACGTCATCTCGTTCTC  
 JF269 TCCATTGGAAATTGTGCTCCTAG  
 JF307 AATGAGCATGCGTTATAAACACATTCTC  
 JF311 AAGCTCTAGAAAAGATATTGGAGGTTCC  
 JF357 TTAATATGCCAGGCCTACTCCTTTGCCGTGATCACCATATGATCGTGAG  
 JF358 AGGAGTAGGCCTGGGCATATTAACGTGCTGACTGATAGAGGATTAGCTAAC  
 T  
 TGAACTC  
 JF355.1 AGGAGTAGGCCTGGGCATATTAACGTGCTGACTGATTGAAAATGGAGTGAC  
 TGAG  
 JF356.1 TTAATATGCCAGGCCTACTCCTTTGCCGTGATTTTATCTTGAGCTCCATT  
 TCAC  
 JF322 ACTGCCAGCATGCTCGTAG  
 JF326 AGATGCTAGCGAAGGGGATGAAGTTG  
 JF359 TTCGTGTTATGATGCCACTAAGCGTCTGCTCGACCTTCAGATTTCAAAC  
 TCATAG  
 JF360 TTAGTGGGCATCATAACACGAAAGAGAGTGATTAGAGCCTGTTCGTAGACC  
 JF355.2 ACGCTTAGTGGGCATCATAACACGAAAGAGAGTGATTGAAAATGGAGTGAC  
 TGAG  
 JF356.2 TGTTATGATGCCACTAAGCGTCTGCTCGGATTTTATCTTGAGCTCCATTCT  
 TCACC  
 JF392 AAGAGAAGTCGGCAATTCAC

---

---

|         |                                                               |
|---------|---------------------------------------------------------------|
| JF393   | ACGAAACCGGGTCTCGGCGTAACACGCTCACTTCACCAAACCACATTTTTC<br>C      |
| JF394   | TGTTACGCCGAGACCCGGTTTCGTCTCTCATTTAGGGATCTAAAATTTTGT/<br>AAAC  |
| JF395   | TAGGGAGTATAAGAGAAGAGC                                         |
| JF355.3 | TGTTACGCCGAGACCCGGTTTCGTCTCTCATGATTGAAAATGGAGTGAGCT<br>AG     |
| JF356.3 | AAACCGGGTCTCGGCGTAACACGCTCACTTGATTTTATCTTGAGCTCCATT<br>TTCACC |
| WN008   | CCAAACCACATTTTCAGTTCACCTCCGCCTT                               |
| WN009   | GTGAACTGAAATGTGGTTTGGTGAGTTTGG                                |
| WN010   | CTAAAAAAGATTTTAGATCCCTAAAAGTTCCTCTA                           |

---

500

500

## REFERENCES

- 501 1. **Alani, E., L. Cao, and N. Kleckner.** 1987. A method for gene disruption that  
502 allows repeated use of URA3 selection in the construction of multiply  
503 disrupted yeast strains. *Genetics* **116**:541-5.
- 504 2. **Allers, T.** 2011. Personal Communication.
- 505 3. **Allers, T., H. P. Ngo, M. Mevarech, and R. G. Lloyd.** 2004. Development  
506 of additional selectable markers for the halophilic archaeon *Haloferax*  
507 *volcanii* based on the *leuB* and *trpA* genes. *Appl Environ Microbiol* **70**:943-  
508 53.
- 509 4. **Bitan-Banin, G., R. Ortenberg, and M. Mevarech.** 2003. Development of a  
510 gene knockout system for the halophilic archaeon *Haloferax volcanii* by use  
511 of the *pyrE* gene. *J Bacteriol* **185**:772-8.
- 512 5. **Blumer-Schuetz, S. E., I. Kataeva, J. Westpheling, M. W. W. Adams,**  
513 **and R. M. Kelly.** 2008. Extremely thermophilic microorganisms for biomass  
514 conversion: status and prospects. *Current Opinion in Biotechnology* **19**:210-  
515 217.
- 516 6. **Bridger, S. L., S. M. Clarkson, K. Stirrett, M. B. Debarry, G. L. Lipscomb,**  
517 **G. J. Schut, J. Westpheling, R. A. Scott, and M. W. Adams.** 2011.  
518 Deletion Strains Reveal Metabolic Roles for Key Elemental Sulfur-  
519 Responsive Proteins in *Pyrococcus furiosus*. *J Bacteriol* **193**:6498-504.
- 520 7. **Chandrayan, S. K., P. M. McTernan, R. C. Hopkins, J. Sun, F. E. Jenney,**  
521 **Jr., and M. W. Adams.** 2012. Engineering hyperthermophilic archaeon

- 522 *Pyrococcus furiosus* to overproduce its cytoplasmic [NiFe]-hydrogenase. J  
523 Biol Chem **287**:3257-64.
- 524 8. **Chung, D., J. R. Huddleston, J. Farkas, and J. Westpheling.** 2011.  
525 Identification and characterization of Cbel, a novel thermostable restriction  
526 enzyme from *Caldicellulosiruptor bescii* DSM 6725 and a member of a new  
527 subfamily of HaeIII-like enzymes Journal of Industrial Microbiology &  
528 Biotechnology.
- 529 9. **Deng, L., H. Zhu, Z. Chen, Y. X. Liang, and Q. She.** 2009. Unmarked gene  
530 deletion and host-vector system for the hyperthermophilic crenarchaeon  
531 *Sulfolobus islandicus*. Extremophiles **13**:735-46.
- 532 10. **Farkas, J., D. Chung, M. Debarry, M. W. Adams, and J. Westpheling.**  
533 2011. Defining Components of the Chromosomal Origin of Replication of the  
534 Hyperthermophilic Archaeon, *Pyrococcus furiosus*, Needed for Construction  
535 of a Stable Replicating Shuttle Vector. Appl Environ Microbiol **77**:6343-6349.
- 536 11. **Fiala, G., and K. O. Stetter.** 1986. *Pyrococcus furiosus* sp. nov. represents  
537 a novel genus of marine heterotrophic archaebacteria growing optimally at  
538 100°C. Archives of Microbiology **145**:56-61.
- 539 12. **Fukui, T., H. Atomi, T. Kanai, R. Matsumi, S. Fujiwara, and T. Imanaka.**  
540 2005. Complete genome sequence of the hyperthermophilic archaeon  
541 *Thermococcus kodakaraensis* KOD1 and comparison with *Pyrococcus*  
542 genomes. Genome Res **15**:352-63.
- 543 13. **Grogan, D. W., and K. R. Stengel.** 2008. Recombination of synthetic  
544 oligonucleotides with prokaryotic chromosomes: substrate requirements of

- 545 the *Escherichia coli*  $\lambda$ Red and *Sulfolobus acidocaldarius* recombination  
546 systems. *Molecular Microbiology* **69**:1255-1265.
- 547 14. **Haldenby, S.** 2007. Genetic Analysis of RadB, a Parologue of the Archaeal  
548 Rad51/RecA Homologue, RadA. University of Nottingham.
- 549 15. **Haldenby, S., M. F. White, and T. Allers.** 2009. RecA family proteins in  
550 archaea: RadA and its cousins. *Biochemical Society Transactions* **37**:102-  
551 107.
- 552 16. **Hopkins, R. C., J. Sun, F. E. Jenney, Jr., S. K. Chandrayan, P. M.**  
553 **McTernan, and M. W. Adams.** 2011. Homologous Expression of a  
554 Subcomplex of *Pyrococcus furiosus* Hydrogenase that Interacts with  
555 Pyruvate Ferredoxin Oxidoreductase. *PLoS ONE* **6**:e26569.
- 556 17. **Horton, R. M., Z. L. Cai, S. N. Ho, and L. R. Pease.** 1990. Gene splicing by  
557 overlap extension: tailor-made genes using the polymerase chain reaction.  
558 *Biotechniques* **8**:528-535.
- 559 18. **Ishikawa, K., M. Watanabe, T. Kuroita, I. Uchiyama, J. M. Bujnicki, B.**  
560 **Kawakami, M. Tanokura, and I. Kobayashi.** 2005. Discovery of a novel  
561 restriction endonuclease by genome comparison and application of a wheat-  
562 germ-based cell-free translation assay: *Pabl* (5'-GTA/C) from the  
563 hyperthermophilic archaeon *Pyrococcus abyssi*. *Nucleic Acids Research*  
564 **33**:e112.
- 565 19. **Komori, K., T. Miyata, J. DiRuggiero, R. Holley-Shanks, I. Hayashi, I. K.**  
566 **O. Cann, K. Mayanagi, H. Shinagawa, and Y. Ishino.** 2000. Both RadA

- 567 and RadB Are Involved in Homologous Recombination in *Pyrococcus*  
568 *furiosus*. The Journal of Biological Chemistry **275**:33782-33790.
- 569 20. **Kurosawa, N., and D. W. Grogan.** 2005. Homologous recombination of  
570 exogenous DNA with the *Sulfolobus acidocaldarius* genome: properties and  
571 uses. FEMS Microbiol Lett **253**:141-9.
- 572 21. **Lipscomb, G. L., K. Stirrett, G. J. Schut, F. Yang, F. E. Jenney, Jr., R. A.**  
573 **Scott, M. W. Adams, and J. Westpheling.** 2011. Natural competence in  
574 the hyperthermophilic archaeon *Pyrococcus furiosus* facilitates genetic  
575 manipulation: construction of markerless deletions of genes encoding the  
576 two cytoplasmic hydrogenases. Appl Environ Microbiol **77**:2232-8.
- 577 22. **Matsumi, R., K. Manabe, T. Fukui, H. Atomi, and T. Imanaka.** 2007.  
578 Disruption of a sugar transporter gene cluster in a hyperthermophilic  
579 archaeon using a host-marker system based on antibiotic resistance. J  
580 Bacteriol **189**:2683-91.
- 581 23. **Miozzari, G., P. Niederberger, and R. Hutter.** 1977. Action of tryptophan  
582 analogues in *Saccharomyces cerevisiae*. Arch Microbiol **115**:307-16.
- 583 24. **Peck, R. F., S. DasSarma, and M. P. Krebs.** 2000. Homologous gene  
584 knockout in the archaeon *Halobacterium salinarum* with *ura3* as a  
585 counterselectable marker. Mol Microbiol **35**:667-76.
- 586 25. **Pingoud, V., C. Conzelmann, S. Kinzebach, A. Sudina, V. Metelev, E.**  
587 **Kubareva, J. M. Bujnicki, R. Lurz, G. Luder, S. Y. Xu, and A. Pingoud.**  
588 2003. PspGI, a type II restriction endonuclease from the extreme  
589 thermophile *Pyrococcus* sp. structural and functional studies to investigate



- 590 an evolutionary relationship with several mesophilic restriction enzymes. J  
591 Mol Biol **329**:913-29.
- 592 26. **Pritchett, M. A., J. K. Zhang, and W. W. Metcalf.** 2004. Development of a  
593 markerless genetic exchange method for *Methanosarcina acetivorans* C2A  
594 and its use in construction of new genetic tools for methanogenic archaea.  
595 Appl Environ Microbiol **70**:1425-33.
- 596 27. **Sandler, S. J., P. Hugenholtz, C. Schleper, E. F. DeLong, N. R. Pace,**  
597 **and A. J. Clark.** 1999. Diversity of *radA* genes from cultured and uncultured  
598 Archaea: Comparative analysis of putative RadA proteins and their use as a  
599 phylogenetic marker. Journal of Bacteriology **181**:907-915.
- 600 28. **Sandler, S. J., L. H. Satin, H. S. Samra, and A. J. Clark.** 1996. *recA*-like  
601 genes from three archaean species with putative protein products similar to  
602 Rad51 and Dmc1 proteins of the yeast *Saccharomyces cerevisiae*. Nucleic  
603 Acids Res **24**:2125-32.
- 604 29. **Sato, T., T. Fukui, H. Atomi, and T. Imanaka.** 2005. Improved and  
605 Versatile Transformation System Allowing Multiple Genetic Manipulations of  
606 the Hyperthermophilic Archaeon *Thermococcus kodakaraensis*. Applied and  
607 Environmental Microbiology **71**:3889-3899.
- 608 30. **Sato, T., T. Fukui, H. Atomi, and T. Imanaka.** 2003. Targeted Gene  
609 Disruption by Homologous Recombination in the Hyperthermophilic  
610 Archaeon *Thermococcus kodakaraensis* KOD1. Journal of Bacteriology  
611 **185**:210-220.

- 612 31. **Spitalny, P., and M. Thomm.** 2008. A polymerase III-like reinitiation  
613 mechanism is operating in regulation of histone expression in archaea. *Mol*  
614 *Microbiol* **67**:958-70.
- 615 32. **Stetter, K. O.** 1996. Hyperthermophilic procaryotes. *FEMS Microbiology*  
616 *Reviews* **18**:149-158.
- 617 33. **Stothard, P.** 2000. The sequence manipulation suite: JavaScript programs  
618 for analyzing and formatting protein and DNA sequences. *Biotechniques*  
619 **28**:1102, 1104.
- 620 34. **Strand, K. R., C. Sun, T. Li, F. E. Jenney, Jr., G. J. Schut, and M. W.**  
621 **Adams.** 2010. Oxidative stress protection and the repair response to  
622 hydrogen peroxide in the hyperthermophilic archaeon *Pyrococcus furiosus*  
623 and in related species. *Arch Microbiol* **192**:447-59.
- 624 35. **Tang, X., S. Ezaki, S. Fujiwara, M. Takagi, H. Atomi, and T. Imanaka.**  
625 1999. The tryptophan biosynthesis gene cluster trpCDEGFBA from  
626 *Pyrococcus kodakaraensis* KOD1 is regulated at the transcriptional level  
627 and expressed as a single mRNA. *Mol Gen Genet* **262**:815-21.
- 628 36. **Toyn, J. H., P. L. Gunyuzlu, W. H. White, L. A. Thompson, and G. F.**  
629 **Hollis.** 2000. A counterselection for the tryptophan pathway in yeast: 5-  
630 fluoroanthranilic acid resistance. *Yeast* **16**:553-60.
- 631 37. **Wang, G., S. P. Kennedy, S. Fasiludeen, C. Rensing, and S. DasSarma.**  
632 2004. Arsenic resistance in *Halobacterium* sp. strain NRC-1 examined by  
633 using an improved gene knockout system. *J Bacteriol* **186**:3187-94.

634 38. **Woods, W. G., and M. L. Dyall-Smith.** 1997. Construction and analysis of a  
635 recombination-deficient (*radA*) mutant of *Haloferax volcanii*. *Molecular*  
636 *Microbiology* **23**:791-797.

637

638
